# Supplementary material for: 2D europium coordination polymer as a regenerable fluorescence probe for efficiently detecting fipronil
Source: Royal Society of Chemistry journal article supplement (doi:10.1039/c8an00701b), 2018-01-01
Supplement: c8an00701b1.pdf [file c8an00701b1.pdf]

## Supporting Information

### 2D europium coordination polymer as a regenerable fluorescence probe for efficiently detecting fipronil

Shuai-Liang Yang,<sup>a</sup> Jiu-Nan Lu,<sup>a</sup> Sai-Jun Zhang,<sup>a</sup> Chen-Xi Zhang<sup>a,b,\*</sup> and Qing-Lun Wang<sup>c,d</sup>

<sup>a</sup> College of Chemical Engineering and Materials Science, Tianjin University of Science and Technology, Tianjin 300457, P. R. China Email: [zcx@tust.edu.cn](mailto:zcx@tust.edu.cn)

<sup>b</sup> Tianjin Key Laboratory of Marine Resources and Chemistry, Tianjin 300457, P. R. China

<sup>c</sup> Key Laboratory of Advanced Energy Materials Chemistry (Ministry of Education), Nankai University, Tianjin 300071, P. R. China

<sup>d</sup> College of Chemistry, Nankai University, Tianjin 300071, P. R. China

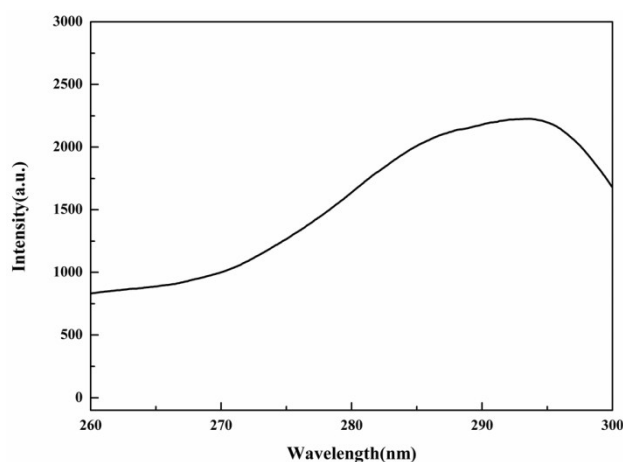

**Fig. S1** The excitation spectra of **1** ( $\lambda_{em}=617nm$ ).

---

\* Corresponding author. Email: [zcx@tust.edu.cn](mailto:zcx@tust.edu.cn)

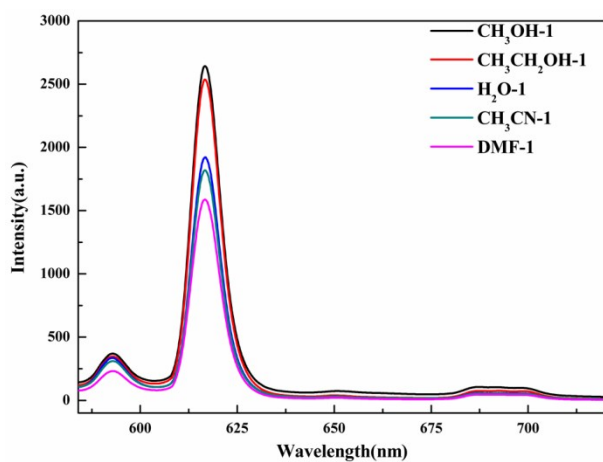

**Fig. S2** Emission spectrum of **1** in different solvents.

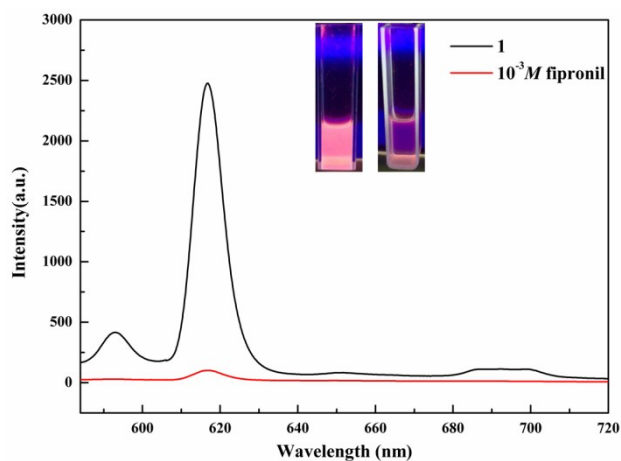

**Fig. S3** Emission spectrum of **1** in methanol solution (black solid line) and  $10^{-3}$  M fipronil methanol solution (red solid line). Inset is the corresponding color photographs under irradiation of 254 nm UV light.

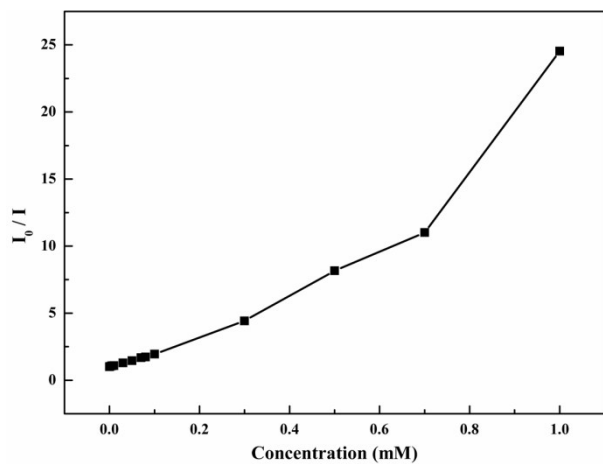

**Fig. S4** The  $I_0/I$  versus the concentration of fipronil for **1** (from 0 to 1 mM).
